# Supplementary material
Source: publisher figshare collection journal article supplement (https://sage.figshare.com/ndownloader/files/17763410)
Supplement: Supplementary file 1 [file 17763410]

**APPENDIX**

**Appendix Table 1.  
Casting and Verifying Provisional Ballots  
in North Carolina General Elections, 2012-2016**

|                                  | <b>M1: Count of<br/>Provisional Ballots Cast</b> |                 | <b>M2: Count of Provisional<br/>Ballots Rejected</b> |                 |
|----------------------------------|--------------------------------------------------|-----------------|------------------------------------------------------|-----------------|
|                                  | <b>b</b>                                         | <b>P&gt; z </b> | <b>b</b>                                             | <b>P&gt; z </b> |
| <i>Electoral Context</i>         |                                                  |                 |                                                      |                 |
| Presidential Election            | 1.24                                             | .000            | 1.02                                                 | .000            |
| <i>Voter List Maintenance</i>    |                                                  |                 |                                                      |                 |
| College/s in County              | .122                                             | .630            | -.243                                                | .354            |
| Inactive Voters (%)              | 1.901                                            | .006            | 2.87                                                 | .000            |
| New Registrations (%)            | .595                                             | .017            | .617                                                 | .017            |
| Duplicate Registrations (%)      | .155                                             | 0.684           | .703                                                 | .078            |
| Rejected Registrations (%)       | 12.697                                           | 0.009           | 7.755                                                | .154            |
| <i>Administrative Capacity</i>   |                                                  |                 |                                                      |                 |
| County Population<br>(Thousands) | .001                                             | .467            | .002                                                 | .009            |
| Precinct Density                 | .045                                             | .180            | .044                                                 | .296            |
| Poll Worker Capacity             | -.026                                            | .194            | -.007                                                | .685            |
| Constant                         | .922                                             | 0.000           | .655                                                 | 0.006           |
| Wald-Chi2                        | 670.6                                            |                 | 518.34                                               |                 |
| N                                | 300                                              |                 | 300                                                  |                 |

Note: Unstandardized negative binomial regression estimates and p-values, with county-fixed effects.

**Appendix Figure 1.**  
**Casting and Verifying Provisional Ballots**  
**in North Carolina General Elections, 2012-2016**

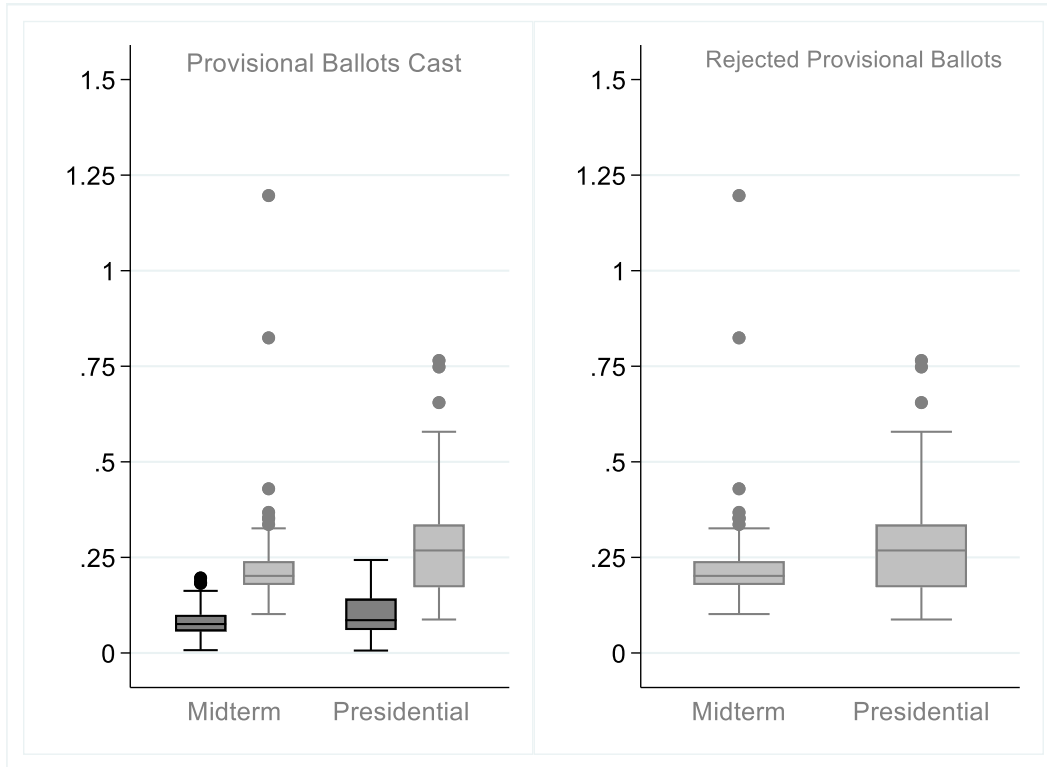

**Black= % inactive voters; Grey= % newly registered voters**

Note: Predicted probabilities from unstandardized negative binomial regression estimates and p-values, with robust SEs, clustered by county.

**Appendix Table 2.**  
**Reasons for Rejecting Provisional Ballots**  
**by Reason for Voting Provisionally**

| <b>Reason for Provisional Ballot</b> | <b>Reason for Invalidating Provisional Ballot</b> |                             |              |                        |
|--------------------------------------|---------------------------------------------------|-----------------------------|--------------|------------------------|
|                                      | Not Registered                                    | Registration After Deadline | Removed      | Voting Out of Precinct |
| Incorrect Party                      | 4                                                 | 0                           | 1            | 3                      |
| Incorrect Precinct                   | 197                                               | 0                           | 23           | 3,693                  |
| Jurisdiction Dispute                 | 83                                                | 0                           | 5            | 26                     |
| No Acceptable ID                     | 68                                                | 0                           | 3            | 11                     |
| No Record of Registration            | 25,183                                            | 770                         | 1,184        | 451                    |
| Nonreasonable Resemblance            | 2                                                 | 0                           | 1            | 0                      |
| Previously Removed                   | 772                                               | 17                          | 1,557        | 82                     |
| Unrecognized Address                 | 76                                                | 2                           | 6            | 22                     |
| Unreported Move                      | 316                                               | 0                           | 57           | 306                    |
| Voted Extended Hours                 | 2                                                 | 0                           | 0            | 11                     |
| Already Voted                        | 6                                                 | 0                           | 0            | 8                      |
| <b>Total</b>                         | <b>26,709</b>                                     | <b>794</b>                  | <b>2,837</b> | <b>4,613</b>           |
